# Supplementary material
Source: PubMed Central journal article supplement (PMC5790554)
Supplement: NIHMS930778-supplement.pdf [file NIHMS930778-supplement.pdf]

## Supplemental Materials

**Supplemental Table 1: Characteristics of patients with secondary FSGS with identifiable risk factor(s) vs secondary FSGS without identifiable risk factor(s)**

**Supplemental Table 2: Treatment and renal outcomes for patient with focal segmental glomerulosclerosis**

**Supplemental Figure 1: Overview of study design.**

**Supplemental Figure 2: Correlation between proteinuria and foot process effacement in patients with primary FSGS (red squares) and secondary FSGS (blue diamonds).** All patients with primary FSGS had proteinuria > 3.5 g/day. However, patients with secondary FSGS had proteinuria that ranged from 46 mg/day to 11 g/day. Pearson's correlation coefficient (R) for correlation between the degree of foot process effacement and proteinuria was 0.41,  $P=.008$  for the total cohort.

**Supplemental Figure 3: Trends in the incidence rates of kidney biopsy, glomerular diseases and focal segmental glomerulosclerosis in Olmsted County over the period of 1994-2013.** Using Poisson regression models, estimated native kidney biopsy incidence rates increased significantly from 1994-2003 to 2004-2013 (17% increase per 5 years,  $P<.001$ ). The incidence of glomerular diseases also increased during the same time period but was not statistically significant (11% increase per 5 years,  $P=.05$ ). Incidence of focal segmental glomerulosclerosis increased significantly over the same time period (41% increase per 5 years,  $P=.02$ ).

**Supplemental Figure 4: Trends in the incidence rates of kidney biopsy, focal segmental glomerulosclerosis and all subtypes of glomerular diseases in Olmsted County over the period of 1994-2013.** Abbreviations: FSGS, focal segmental glomerulosclerosis; Global GS, global glomerulosclerosis; GN, glomerulonephritis; IgA, Immunoglobulin A Nephropathy; MN, membranous nephropathy; MPGN, membranoproliferative glomerulonephritis. Other included cases of amyloidosis, Fabry's disease, Fibrillary glomerulonephritis, HIV-associated nephropathy, infection-associated glomerulonephritis, monoclonal gammopathy of renal significance, thrombotic microangiopathy.

**Supplemental Table 1: Characteristics of patients with secondary FSGS with identifiable risk factor vs secondary FSGS without identifiable risk factor**

| Characteristic                                    | Secondary FSGS with identifiable risk factors <sup>a</sup><br>N=13 | Secondary FSGS without identifiable risk factors<br>N=21 | P value    |
|---------------------------------------------------|--------------------------------------------------------------------|----------------------------------------------------------|------------|
|                                                   | Mean (SD) or N(%)                                                  | Mean (SD) or N(%)                                        |            |
| <b>Demographics</b>                               |                                                                    |                                                          |            |
| Age, yr                                           | 47 ± 20.4                                                          | 55 ± 18.1                                                | .30        |
| Male                                              | 3 (23%)                                                            | 15 (71%)                                                 | <b>.01</b> |
| White                                             | 11 (85%)                                                           | 15 (71%)                                                 | .44        |
| <b>Clinical characteristics at time of biopsy</b> |                                                                    |                                                          |            |
| SBP at time of biopsy, mmHg                       | 131 ± 28.1                                                         | 141 ± 20.1                                               | .79        |
| DBP at time of biopsy, mmHg                       | 77 ± 17.4                                                          | 80 ± 15.9                                                | .62        |
| BMI, kg/m <sup>2</sup>                            | 29.7 ± 8.6                                                         | 32.9 ± 6.7                                               | .11        |
| Comorbidities                                     |                                                                    |                                                          |            |
| HTN                                               | 9 (69%)                                                            | 19 (90%)                                                 | .17        |
| DM                                                | 2 (15%)                                                            | 7 (35%)                                                  | .26        |
| Vascular disease <sup>b</sup>                     | 4 (40%)                                                            | 6 (30%)                                                  | .69        |
| Dyslipidemia                                      | 5 (38%)                                                            | 12 (57%)                                                 | .48        |
| BMI > 30                                          | 4 (31%)                                                            | 13 (68%)                                                 | .07        |
| <b>Medications at time of biopsy</b>              |                                                                    |                                                          |            |
| ACEi/ARB                                          | 6 (46%)                                                            | 14 (67%)                                                 | .30        |
| Statins                                           | 5 (38%)                                                            | 12 (57%)                                                 | .48        |
| <b>Laboratory data at time of biopsy</b>          |                                                                    |                                                          |            |
| Serum creatinine mg/dl                            |                                                                    |                                                          |            |
| Median (IQR)                                      | 1.4 (1.05-2.1)                                                     | 1.45 (1.05-2.3)                                          | .79        |
| Albumin, g/dl                                     | 3.9 ± 0.3                                                          | 4.1 ± 0.3                                                | .06        |
| Proteinuria, g/day                                | 2.8 ± 1.8                                                          | 3.4 ± 3.1                                                | .92        |
| Total cholesterol, mg/dl                          | 219 ± 85.7                                                         | 213 ± 50.4                                               | .86        |
| <b>Biopsy characteristics</b>                     |                                                                    |                                                          |            |

|                                               |           |           |            |
|-----------------------------------------------|-----------|-----------|------------|
| Number of glomeruli                           | 19 ± 15.0 | 12 ± 7.5  | .26        |
| % Globally sclerotic glomeruli                | 27% ± 24  | 48% ± 24  | <b>.02</b> |
| Globally sclerotic glomeruli abnormal for age |           |           |            |
| Interstitial fibrosis >5%                     | 13 (100%) | 18 (86%)  | .27        |
| Interstitial fibrosis >25%                    | 2 (15%)   | 10 (48%)  | .08        |
| Arteriosclerosis 0-3 <sup>c</sup>             | 1.2 ± 1.0 | 1.3 ± 1.1 | .74        |
| Arteriolar hyalinosis 0-3 <sup>c</sup>        | 0.9 ± 1.1 | 1.3 ± 1.1 | .31        |
| Foot process effacement                       | 43% ± 32  | 38% ± 28  | .65        |

Abbreviations: ACEi, angiotensin converting enzyme inhibitor; ARB, angiotensin receptor blocker; BMI, body mass index; DBP, diastolic blood pressure; DM, diabetes mellitus; eGFR, estimated glomerular filtration rate using creatinine-based CKD-EPI equation; FSGS, focal segmental glomerulosclerosis; HTN, hypertension; SBP, systolic blood pressure

<sup>a</sup>Risk factors of secondary FSGS included: included reflux and obstructive uropathy (N=3), confirmed genetic FSGS (N=1), previous nephrectomy or dysplastic kidney (N=2), renal artery stenosis (N=1), thin basement membrane disease (N=2), history of pre-eclampsia (N=2), pamidronate (N=1), and chronic lithium use (N=1)

<sup>b</sup>vascular disease is composite of coronary artery disease, stroke or peripheral arterial disease

<sup>c</sup>scale 0-3 with 0=none, 1=mild, 2=moderate, 3=severe

**Supplemental Table 2: Treatment and follow-up of patient with FSGS**

|                                                       | <b>Primary<br/>FSGS<br/>N=12</b> | <b>Secondary<br/>FSGS<br/>N=34<sup>a</sup></b> |                              |
|-------------------------------------------------------|----------------------------------|------------------------------------------------|------------------------------|
|                                                       | <b>Immunosuppression<br/>N=4</b> | <b>Conservative<br/>N=8</b>                    | <b>Conservative<br/>N=32</b> |
|                                                       | <b>Mean ± SD or N(%)</b>         | <b>Mean ± SD or N(%)</b>                       | <b>Mean ± SD or N(%)</b>     |
| Treated with ACEi/ARB after biopsy                    | 4 (100%)                         | 6 (75%) <sup>b</sup>                           | 27 (84%) <sup>c</sup>        |
| Baseline proteinuria, g/day                           | 10.0 (3.7)                       | 7.0 (2.8)                                      | 3.1 (2.8)                    |
| Proteinuria at 6 months post biopsy, g/day            | 3.3 (2.9)                        | 2.6 (2.1)                                      | 2.2 (2.1)                    |
| Mean difference in proteinuria after treatment, g/day | -8.1 (3.3)                       | -4.6 (0.7)                                     | -1.3 (0.4)                   |
| Progressing to ESRD (%) <sup>d</sup>                  | 1 (25%)                          | 3 (38%)                                        | 10 (32%)                     |
| Progressing to ESRD or 40% decline in eGFR (%)        | 2 (50%)                          | 5 (63%)                                        | 20 (63%)                     |

Abbreviations: ACEi, angiotensin converting enzyme inhibitor; ARB, angiotensin receptor blocker; eGFR, estimated glomerular filtration rate

using creatinine-based CKD-EPI equation; ESRD, end-stage renal disease;

<sup>a</sup>Two patients treated with immunosuppressive therapy.

<sup>b</sup>Two patients did not receive ACEi or ARB due to advanced CKD at the time of biopsy.

<sup>c</sup>Five patients treated with blood pressure control without ACEi or ARB due to the following reasons: minimal proteinuria (n=1), advanced CKD (n=1), unclear reasons (n=3).

<sup>d</sup>Mean time to progression to ESRD for patients with primary FSGS was 6 months vs 4.5 years for patients with secondary FSGS ( $P=.03$ ).

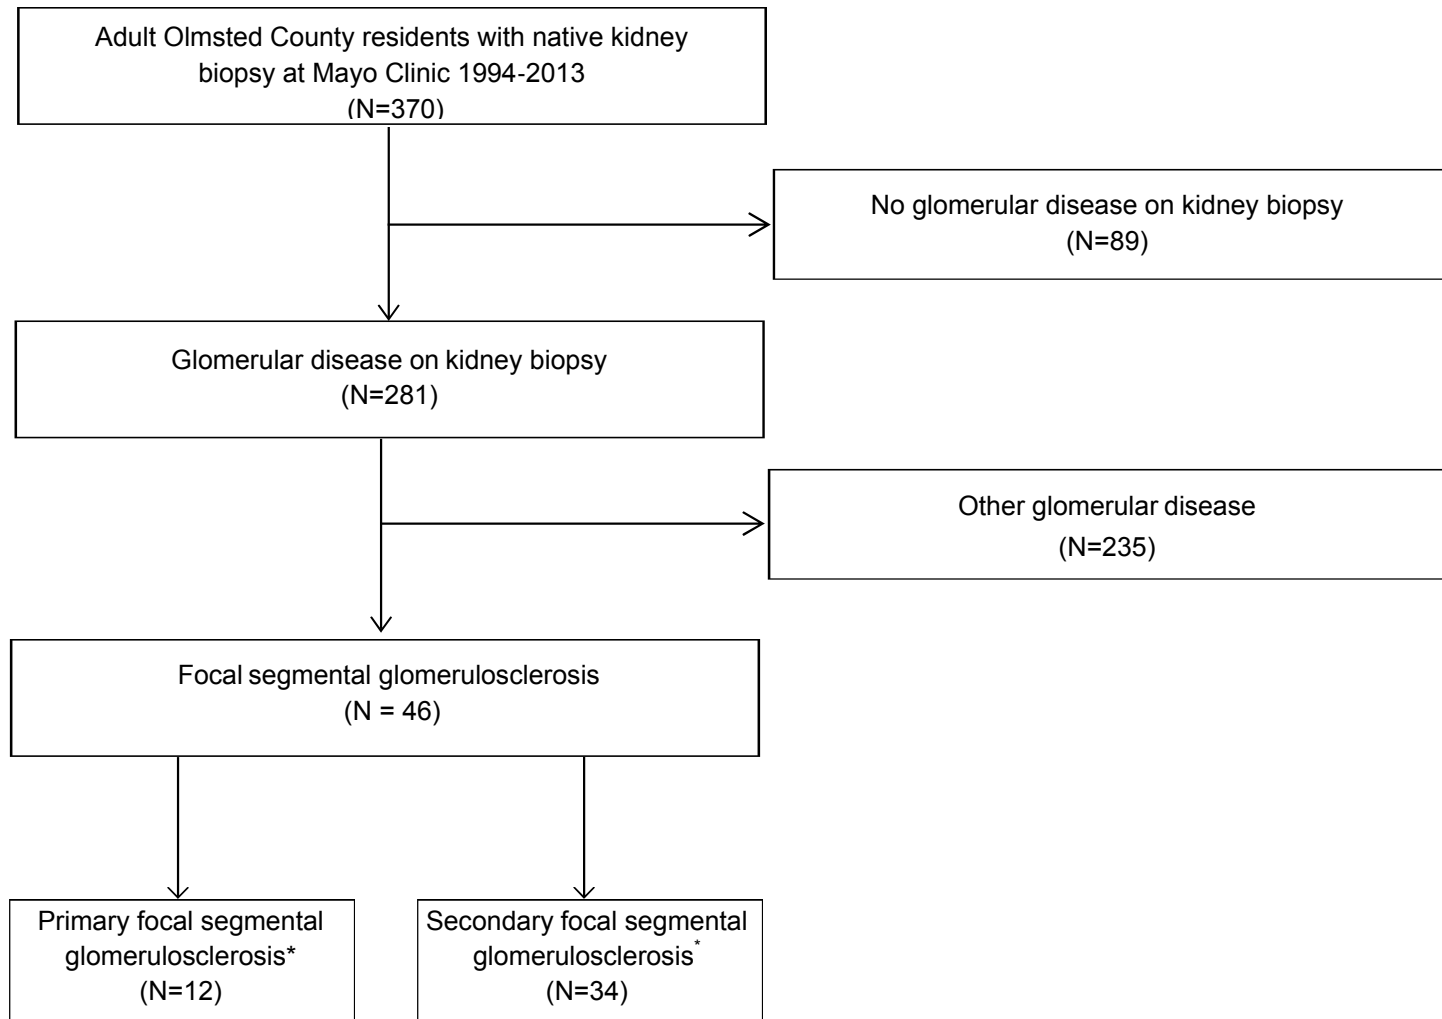

**Supplemental Figure 1: Overview of study design.** \* Primary focal segmental glomerulosclerosis was defined as foot process effacement  $\geq 80\%$  without identifiable cause. All other patients were classified as secondary focal segmental glomerulosclerosis. Four patients without available electron micrographs were classified based on their clinical presentation.

## Relation between Proteinuria and Foot Process Effacement

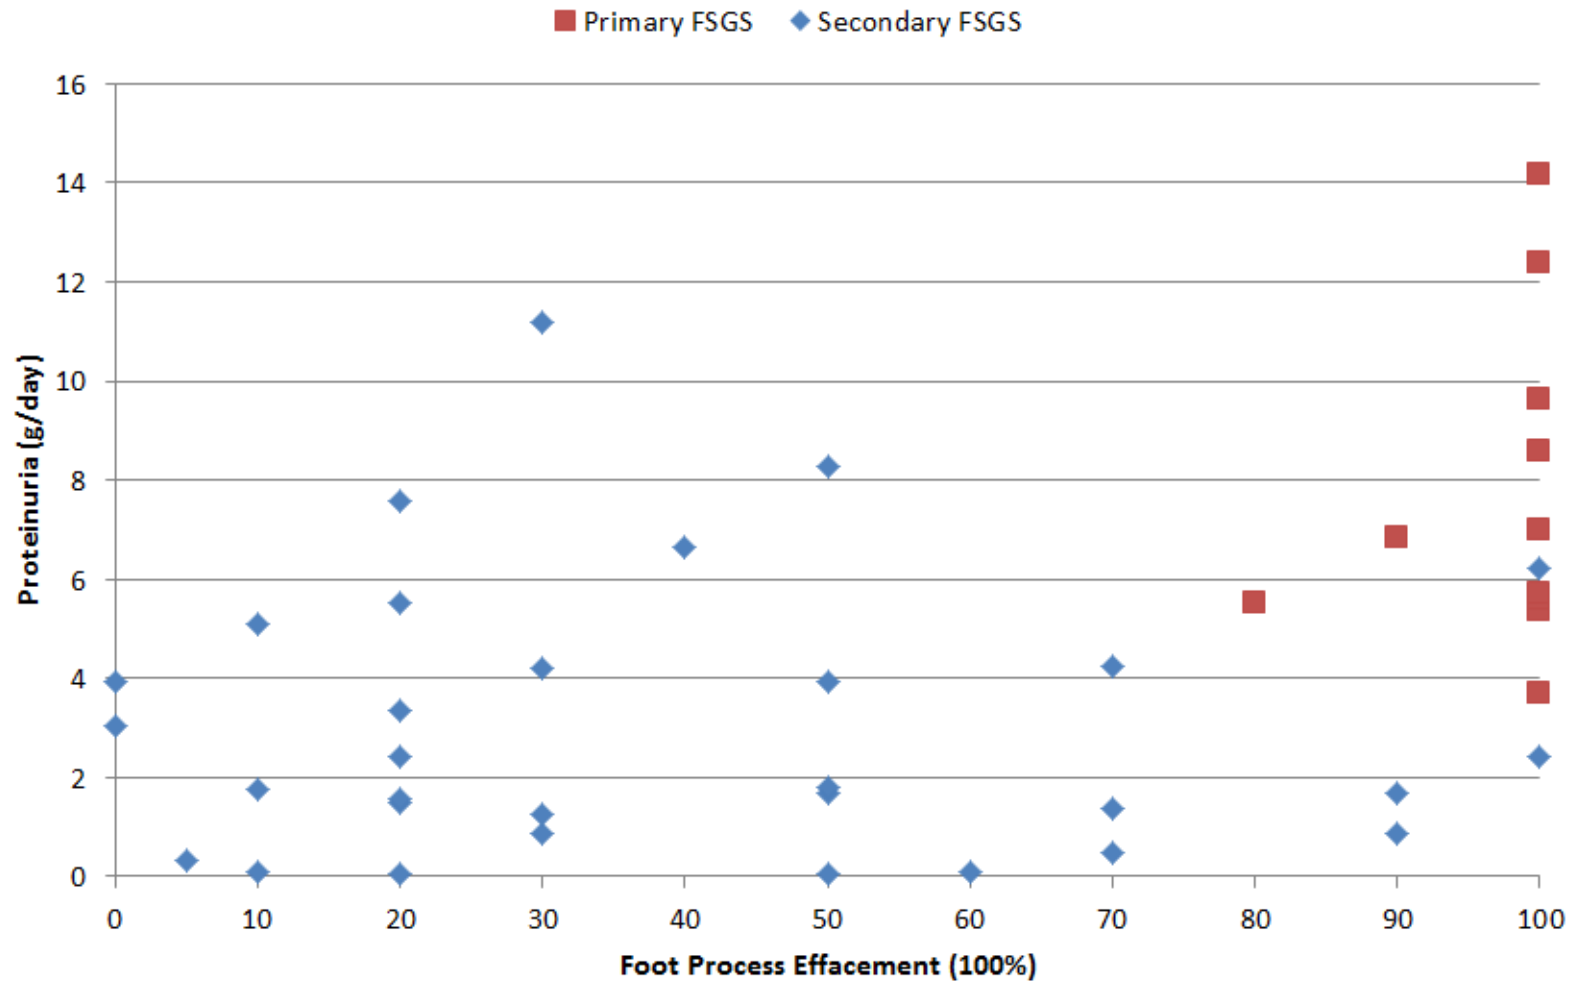

**Supplemental Figure 2: Correlation between proteinuria and foot process effacement in patients with primary FSGS (red squares) and secondary FSGS (blue diamonds).** All patients with primary FSGS had proteinuria > 3.5 g/day. However, patients with secondary FSGS had proteinuria that ranged from 46 mg/day to 11 g/day. Pearson's correlation coefficient (R) for correlation between the degree of foot process effacement and proteinuria was 0.41,  $P=.008$  for the total cohort.

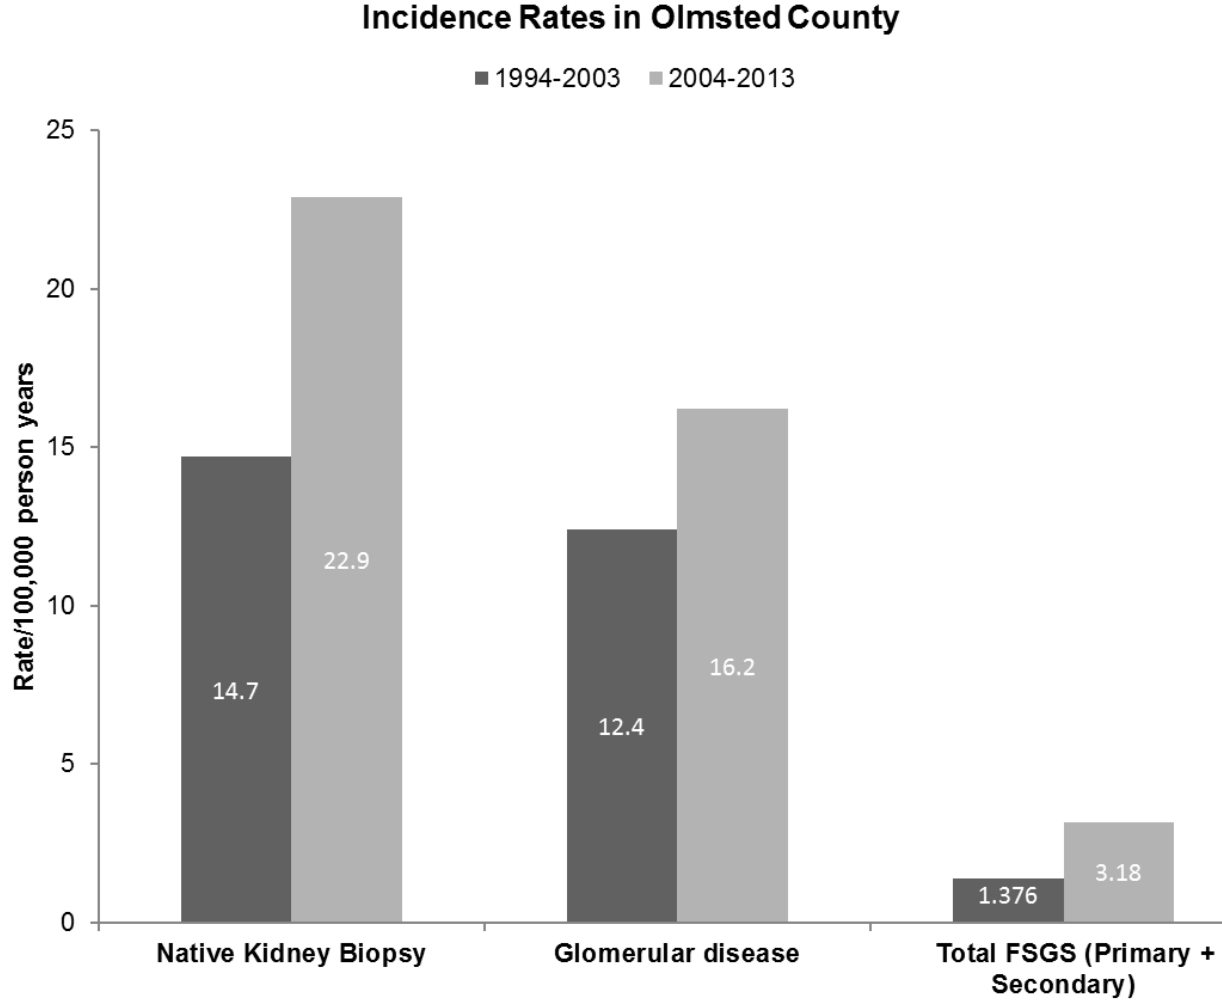

**Supplemental Figure 3: Trends in the incidence rates of kidney biopsy, glomerular diseases and focal segmental glomerulosclerosis in Olmsted County over the period of 1994-2013.** Using Poisson regression models, estimated native kidney biopsy incidence rates increased significantly from 1994-2003 to 2004-2013 (17% increase per 5 years,  $P < .001$ ). The incidence of glomerular diseases also increased during the same time period but was not statistically significant (11% increase per 5 years,  $P = .05$ ). Incidence of focal segmental glomerulosclerosis increased significantly over the same time period (41% increase per 5 years,  $P = .02$ ).

## Incidence Rate of Glomerular Disease in Olmsted County

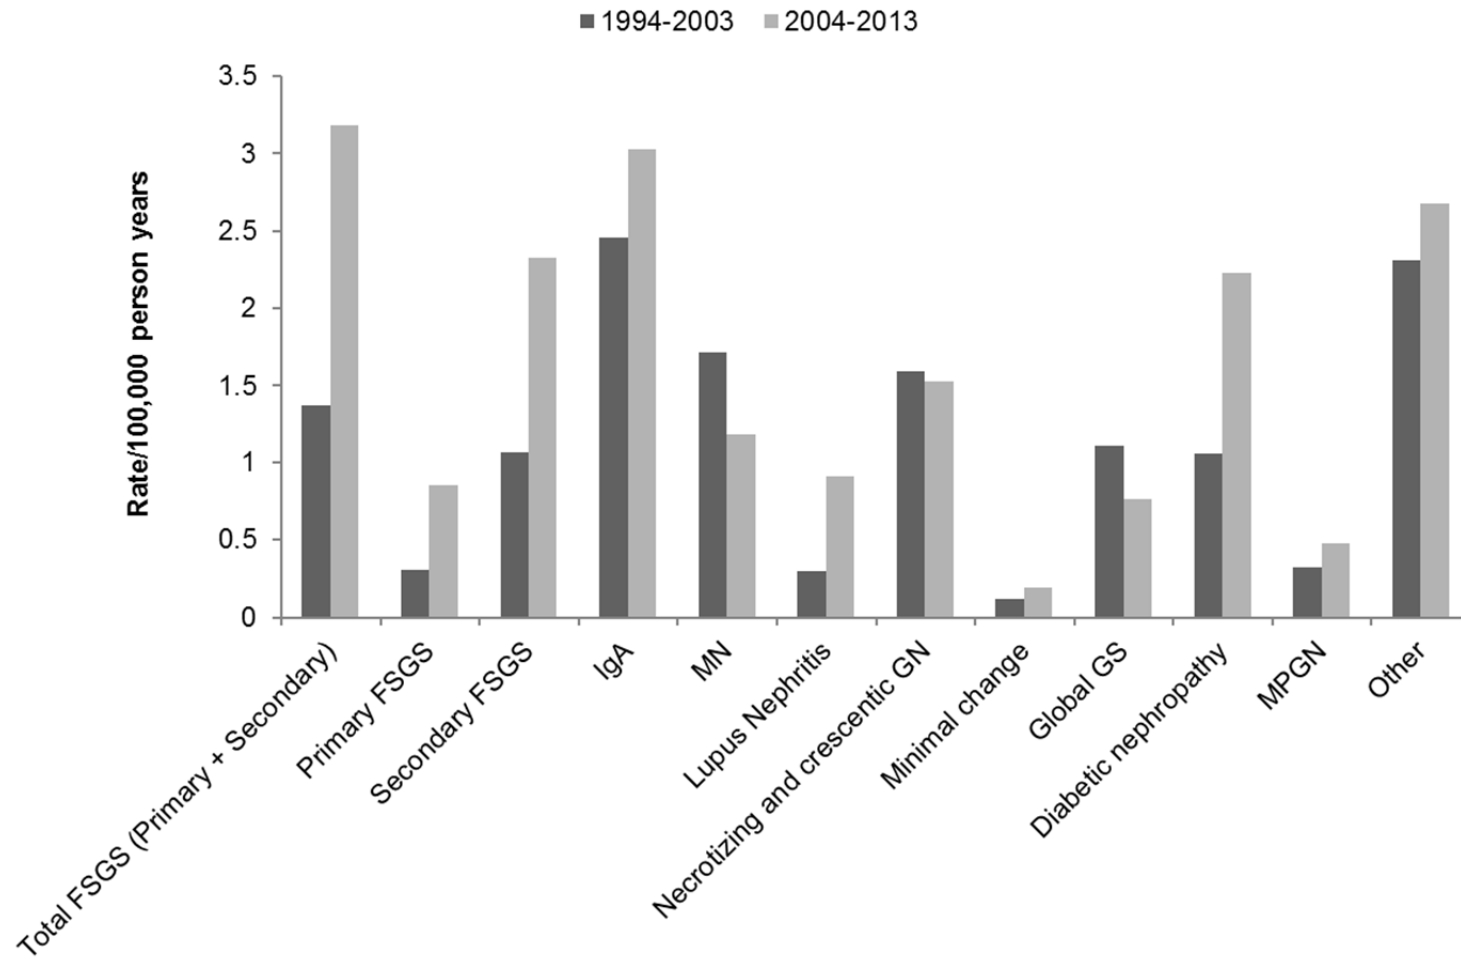

**Supplemental Figure 4: Trends in the incidence rates of kidney biopsy, focal segmental glomerulosclerosis and all subtypes of glomerular diseases in Olmsted County over the period of 1994-2013.** Abbreviations: FSGS, focal segmental glomerulosclerosis; Global GS, global glomerulosclerosis; GN, glomerulonephritis; IgA, Immunoglobulin A Nephropathy; MN, membranous nephropathy; MPGN, membranoproliferative glomerulonephritis. Other included cases of amyloidosis, Fabry's disease, Fibrillary glomerulonephritis, HIV-associated nephropathy, infection-associated glomerulonephritis, monoclonal gammopathy of renal significance, thrombotic microangiopathy.
